# Supplementary material for: A diphenylamino-substituted cationic cyclometalated Ir(iii) complex: its aggregation-induced phosphorescent emission and oxygen sensing properties
Source: Royal Society of Chemistry journal article supplement (doi:10.1039/c9qm00227h), 2019-01-01
Supplement: c9qm00227h1.pdf [file c9qm00227h1.pdf]

## *ESI for*

### **A diphenylamino-substituted cationic cyclometalated Ir(III) complex: its aggregation-induced phosphorescent emission and oxygen sensing properties**

Lei Wang,<sup>a</sup> Zhanming Gao,<sup>a</sup> Chun Liu,\*<sup>a</sup> Xin Jin<sup>b</sup>

<sup>a</sup> State Key Laboratory of Fine Chemicals, Dalian University of Technology, Linggong Road 2, 116024, Dalian, China; E-mail: cliu@dlut.edu.cn

<sup>b</sup> Eco-chemical Engineering Cooperative Innovation Center of Shandong, Qingdao University of Science and Technology, Qingdao 266042, China.

#### **Contents**

Characterization of iridium(III) complexes. *Page S2.*

**Fig. S1 – S4.** Photophysical and electrochemical properties of iridium(III) complexes. *Page S3 - S4*

**Fig. S5 - S8.** Electron density maps and Stern-Volmer plots of oxygen sensing properties of iridium(III) complexes. *Page S5 - S6.*

**Fig. S9 - S13.** NMR and HRMS spectra of iridium(III) complexes. *Page S7 - S9.*

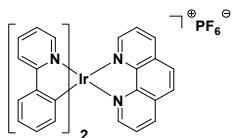

**Ir1**, Yield 71%, yellow solid;  $^1\text{H}$  NMR (400 MHz,  $\text{DMSO-}d_6$ ):  $\delta$  8.90 (d,  $J = 8.2$  Hz, 2H), 8.39 (s, 2H), 8.26 (d,  $J = 8.1$  Hz, 2H), 8.20 (d,  $J = 4.9$  Hz, 2H), 8.05 (dd,  $J = 8.2, 5.1$  Hz, 2H), 7.95 (d,  $J = 7.7$  Hz, 2H), 7.87 (t,  $J = 7.8$  Hz, 2H), 7.46 (d,  $J = 5.7$  Hz, 2H), 7.06 (t,  $J = 7.5$  Hz, 2H), 7.02 - 6.91 (m, 4H), 6.29 (d,  $J = 7.5$  Hz, 2H).

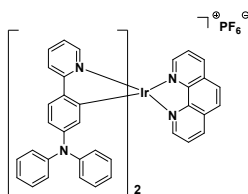

**Ir2**, Yield 62%, yellow solid;  $^1\text{H}$  NMR (400 MHz,  $\text{DMSO-}d_6$ ):  $\delta$  8.89 (dd,  $J = 8.2, 1.2$  Hz, 2H), 8.42 - 8.32 (m, 4H), 8.13 (dd,  $J = 8.2, 5.1$  Hz, 2H), 7.80 (d,  $J = 8.3$  Hz, 2H), 7.72 (d,  $J = 8.7$  Hz, 2H), 7.49 - 7.42 (m, 2H), 7.25 (t,  $J = 7.9$  Hz, 8H), 7.05 (t,  $J = 7.4$  Hz, 6H), 6.98 (d,  $J = 7.6$  Hz, 8H), 6.55 (dd,  $J = 8.6, 2.3$  Hz, 2H), 6.53 - 6.46 (m, 2H), 5.88 (d,  $J = 2.3$  Hz, 2H).  $^{13}\text{C}$  NMR (126 MHz,  $\text{DMSO-}d_6$ ):  $\delta$  171.49, 156.26, 153.60, 153.25, 151.46, 151.33, 142.86, 141.88, 136.27, 134.64, 133.50, 132.39, 130.96, 130.85, 130.61, 129.06, 127.26, 127.15, 124.15, 124.03, 119.09. HRMS (MALDI-TOF,  $m/z$ ): calcd for  $\text{C}_{58}\text{H}_{42}\text{N}_6\text{Ir}$  [ $\text{M} - \text{PF}_6$ ] $^+$  1015.3100, found: 1015.3111.

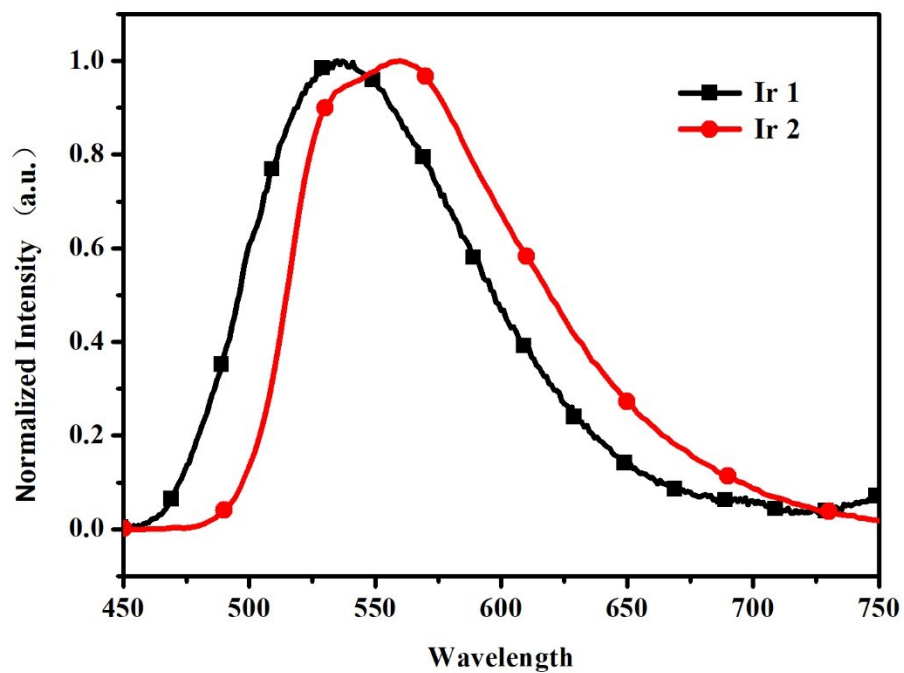

**Fig. S1** Emission spectra of Ir(III) complexes **Ir1** and **Ir2** in EC film at room temperature ( $\lambda_{\text{ex}} = 410$  nm).

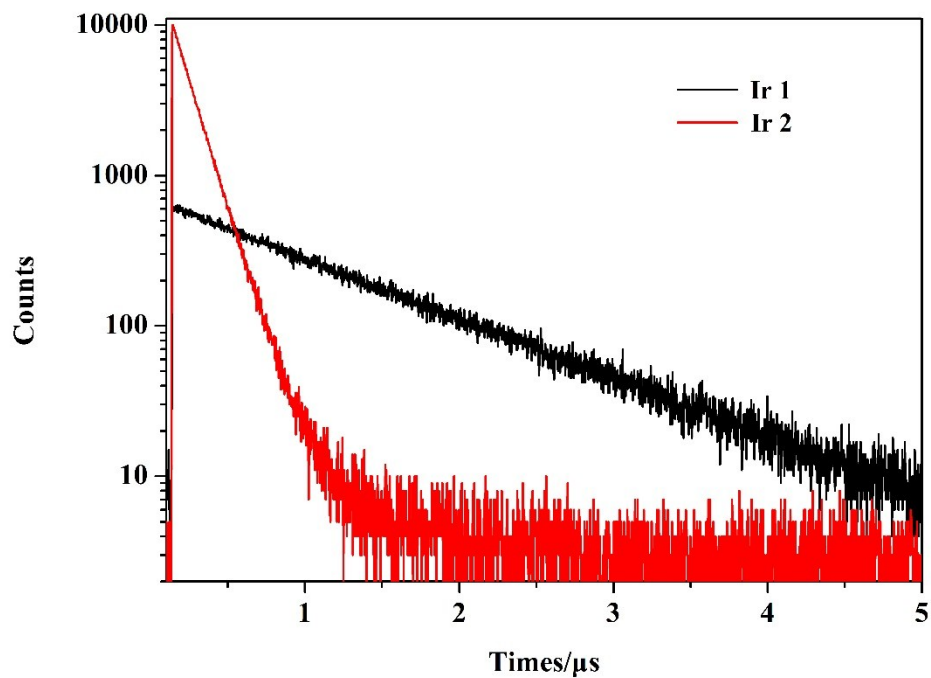

**Fig. S2** Phosphorescence decay profiles of **Ir1** and **Ir2** in  $\text{CH}_2\text{Cl}_2$  at room temperature.

Table S1 The photoluminescence quantum yields ( $\Phi_{\text{PL}}$ ) of complexes **Ir1** and **Ir2** in different states

|     | Photoluminescence quantum yields ( $\Phi_{\text{PL}}$ ) |             |                                                 |
|-----|---------------------------------------------------------|-------------|-------------------------------------------------|
|     | In CH <sub>3</sub> CN                                   | Solid state | CH <sub>3</sub> CN/H <sub>2</sub> O $f_w$ (70%) |
| Ir1 | 3.1%                                                    | 12.5%       | -                                               |
| Ir2 | 0.7%                                                    | 6.1%        | 12.2%                                           |

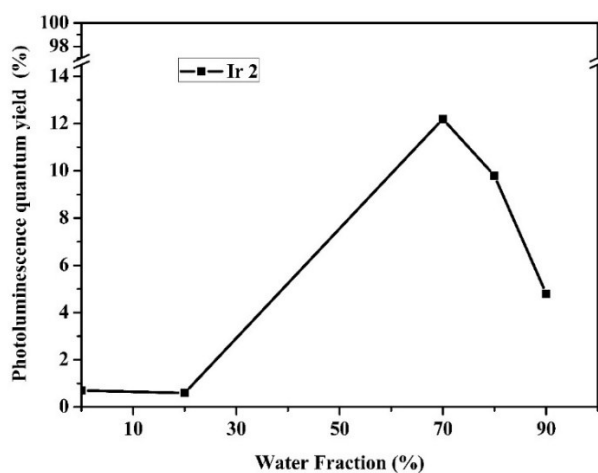

**Fig. S3** The photoluminescence quantum yields ( $\Phi_{\text{PL}}$ ) of complex **Ir2** ( $5.0 \times 10^{-5}$  M) in H<sub>2</sub>O/CH<sub>3</sub>CN with different water fractions (0-90%) at room temperature.

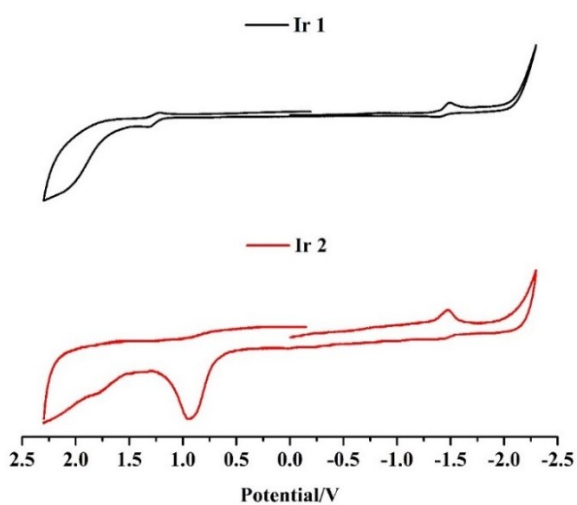

**Fig. S4** Cyclic voltammograms of Ir(III) complexes **Ir1** and **Ir2** in CH<sub>2</sub>Cl<sub>2</sub> ( $1.0 \times 10^{-3}$  M).

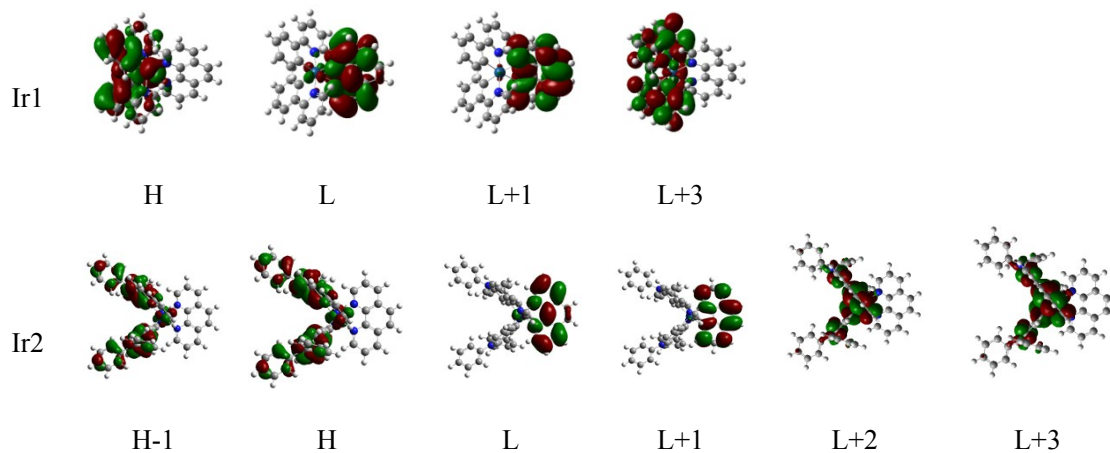

**Fig. S5** Electron density maps of **Ir1** and **Ir2** calculated by a TD-DFT approach.

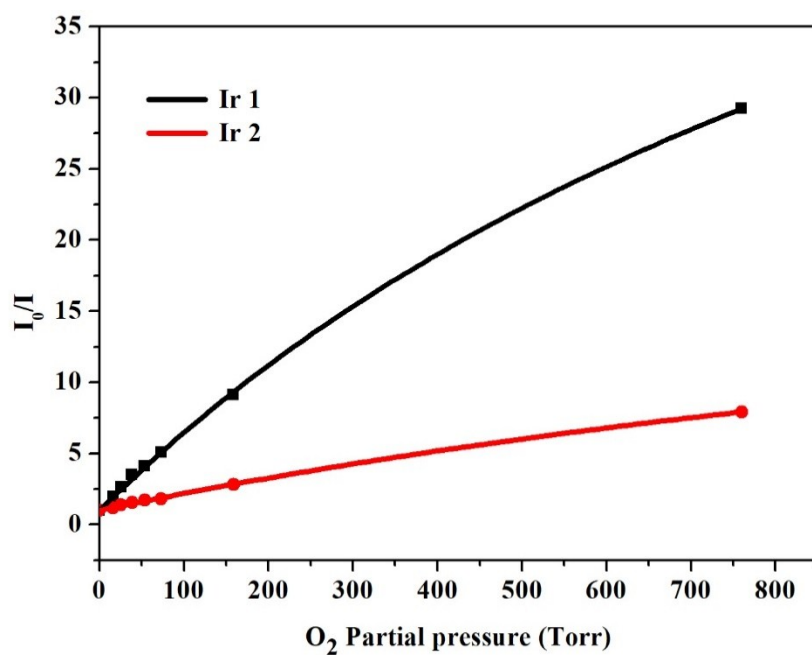

**Fig. S6** Stern-Volmer plots (intensity ratios  $I_0/I$  versus O<sub>2</sub> partial pressure) of **Ir1** and **Ir2** in CH<sub>2</sub>Cl<sub>2</sub> ( $1.0 \times 10^{-5}$  M).

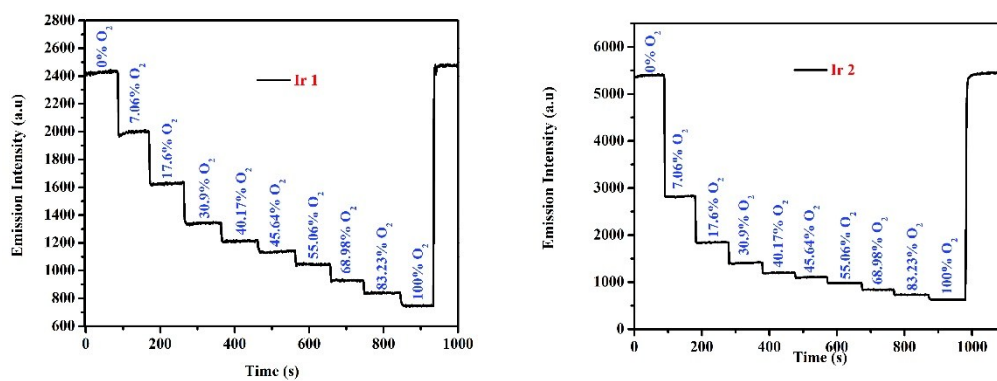

**Fig. S7** Variation of the emission intensity of **Ir1** and **Ir2** immobilized in EC films with the oxygen concentrations.

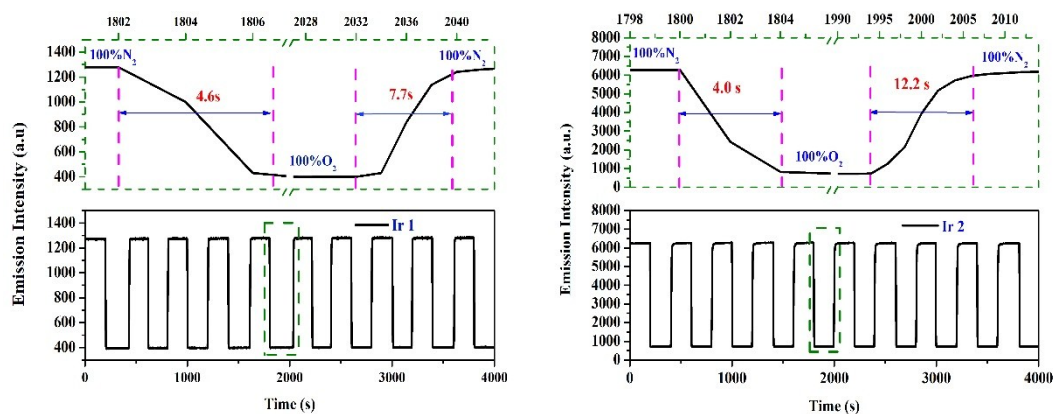

**Fig. S8** Response times and relative intensity change for **Ir1** (left) and **Ir2** (right) immobilized in EC films on switching between 100% nitrogen and 100% oxygen for 4000 s.

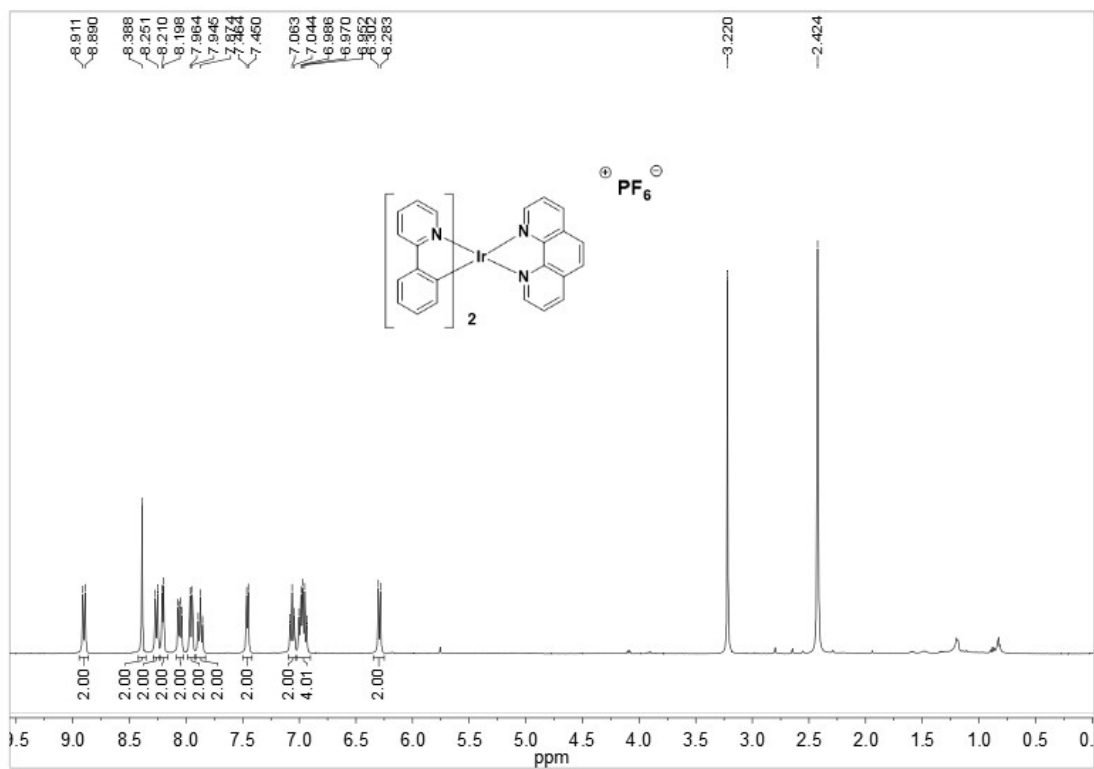

Fig. S9 The  $^1\text{H}$  NMR spectrum of Ir1 in  $\text{DMSO-}d_6$ .

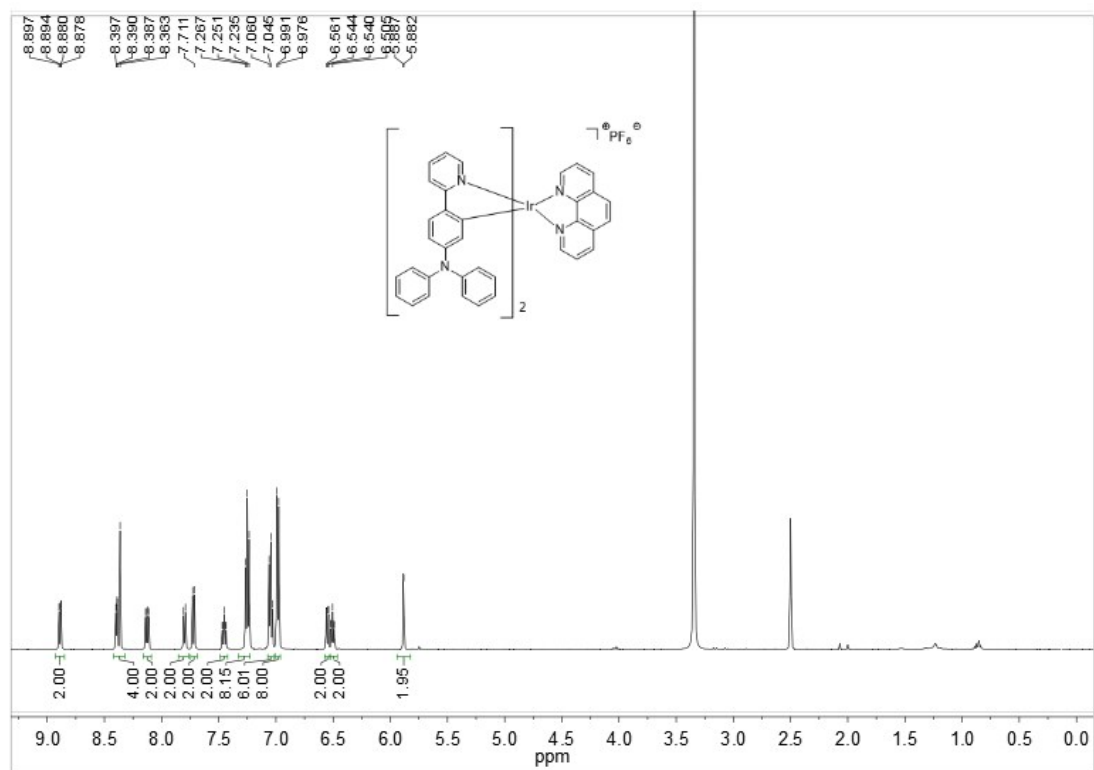

Fig. S10 The  $^1\text{H}$  NMR spectrum of Ir2 in  $\text{DMSO-}d_6$ .

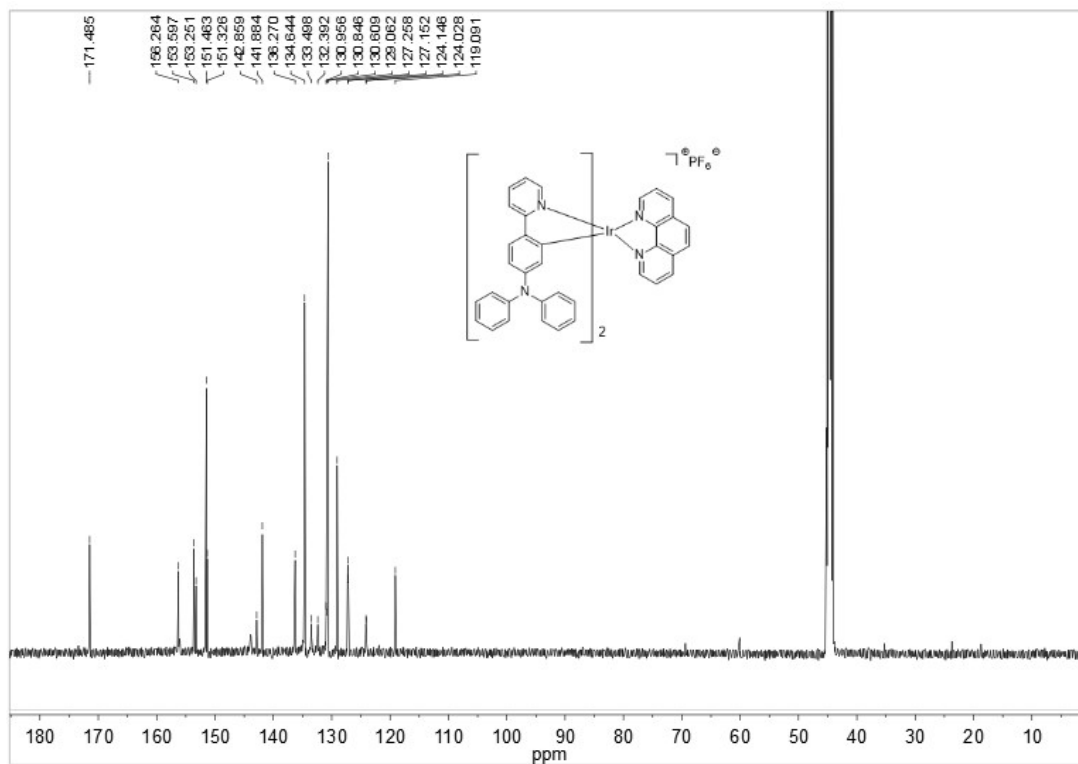

Fig. S11 The  $^{13}\text{C}$  NMR spectrum of **Ir2** in  $\text{DMSO-}d_6$ .

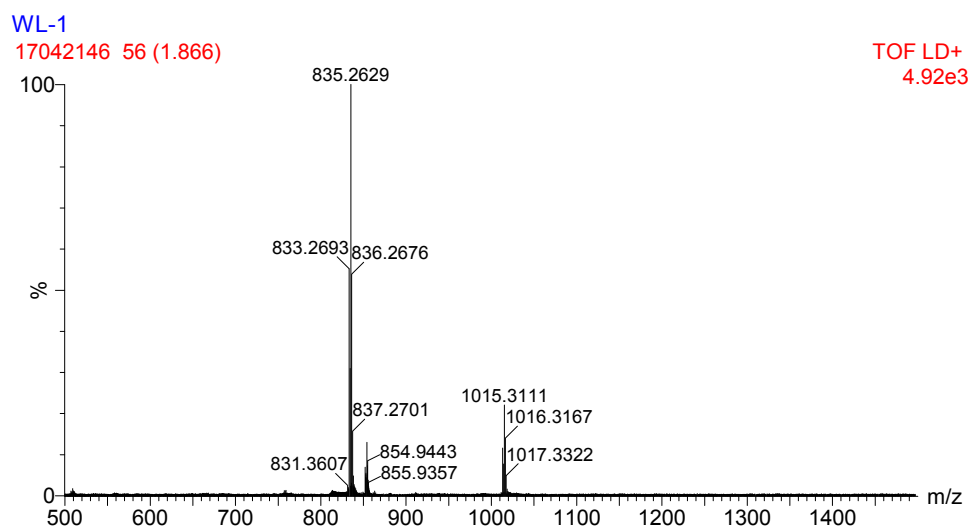

Fig. S12 The HRMS spectrum of cationic portion of **Ir2**.



20180102-WL-M145-#39-48 RT: 0.08-0.10 AV: 10 SB: 8 0.02-0.04 NL: 6.38E4  
T: ITMS - c ESI Full ms [20.00-200.00]

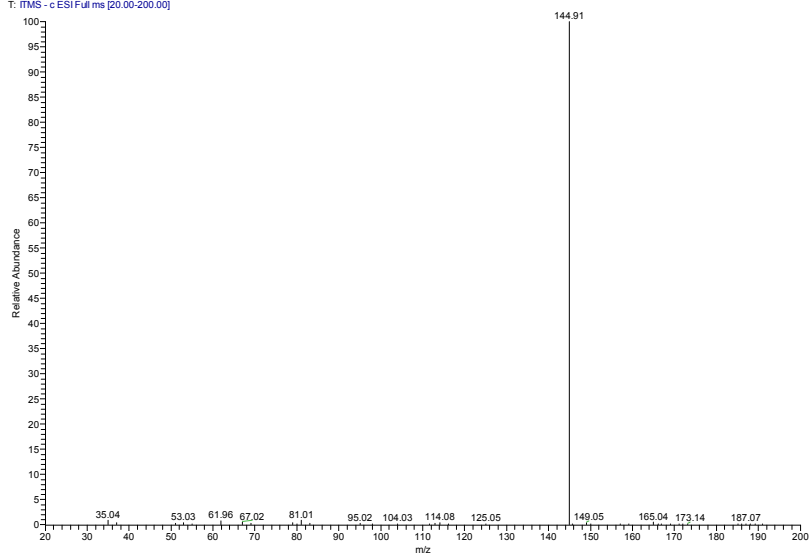

**Fig. S13** The MS spectrum of  $\text{PF}_6^-$ .
